# Supplementary material
Source: MDPI journal article supplement (https://www.mdpi.com/2073-4395/12/12/2922)
Supplement: s1 [file s1]

Archive with 2 entries (2 files):
- supplementary figures-20220904.pdf
- Table S1-S5.xlsx
