# Supplementary material
Source: MDPI journal article supplement (https://www.mdpi.com/2073-4395/12/12/2922)
Supplement: s1 [file s1 › Table S1-S5.xlsx]

## Sheet: Table S1
Table S1 Different expressed miRNAs in Nannong 10-1 by P. sojae
#ID	S01	S02	FDR	log2FC	regulated
gma-miR1508a	1664.71	843.605	0	-0.980628	down
gma-miR1508c	1417.74	734.787	0	-0.948197	down
gma-miR1509a	3568.61	1640.72	0	-1.12103	down
gma-miR1509b	345.459	152.662	0	-1.17817	down
gma-miR1510a-3p	5970.82	2485.38	0	-1.26446	down
gma-miR1510a-5p	3158.62	1381.36	0	-1.19321	down
gma-miR1510b-3p	4500.67	2043.77	0	-1.13891	down
gma-miR1510b-5p	14299.7	8326.7	0	-0.780166	down
gma-miR1512a-3p	15.5263	5.8107	0.00415276	-1.41793	down
gma-miR1512a-5p	17.9522	4.7542	0.000193223	-1.91689	down
gma-miR1512b	286.265	133.117	0	-1.10465	down
gma-miR1515a	125.666	62.3327	0	-1.01153	down
gma-miR1515b	125.666	62.3327	0	-1.01153	down
gma-miR1520e	33.4785	12.6778	3.35e-05	-1.40093	down
gma-miR1520f-5p	58.2235	35.9205	0.00106508	-0.696794	down
gma-miR1535a	6.7927	15.3191	0.0107487	1.17327	up
gma-miR159c	32.5081	20.6015	0.0126222	-0.65805	down
gma-miR159d	38.8156	16.3755	3.35e-05	-1.2451	down
gma-miR166e	12185.2	7970.66	0	-0.612358	down
gma-miR166g	12185.2	7970.66	0	-0.612358	down
gma-miR166i-3p	12185.2	7970.66	0	-0.612358	down
gma-miR166m	15.0411	26.4122	0.00968029	0.812294	up
gma-miR166r	4891.74	2634.88	0	-0.892612	down
gma-miR171b-3p	6.7927	2.113	0.0319567	-1.68469	down
gma-miR171c-3p	32.9933	52.8243	0.00194413	0.679029	up
gma-miR171c-5p	7.2779	15.3191	0.0149207	1.07374	up
gma-miR171n	1.4556	5.2824	0.0434576	1.85958	up
gma-miR171o-3p	32.9933	52.8243	0.00194413	0.679029	up
gma-miR171p	1.4556	5.2824	0.0434576	1.85958	up
gma-miR171q	32.9933	52.8243	0.00194413	0.679029	up
gma-miR171r	13.5855	2.6412	0.000273007	-2.3628	down
gma-miR171s	12.1299	2.6412	0.00102009	-2.1993	down
gma-miR172a	73.7497	28.5251	0	-1.37041	down
gma-miR172b-3p	73.7497	28.5251	0	-1.37041	down
gma-miR172c	13.1003	1.5847	4.08e-05	-3.04732	down
gma-miR172d	13.1003	1.5847	4.08e-05	-3.04732	down
gma-miR172e	13.1003	1.5847	4.08e-05	-3.04732	down
gma-miR172f	72.7793	28.5251	0	-1.3513	down
gma-miR172h-3p	73.7497	28.5251	0	-1.37041	down
gma-miR172i-3p	4.3668	0.5282	0.0256873	-3.04742	down
gma-miR172l	4.3668	0.5282	0.0256873	-3.04742	down
gma-miR319f	4.852	13.2061	0.00704812	1.44455	up
gma-miR319p	1717.11	768.594	0	-1.15969	down
gma-miR393c-3p	39.786	22.7145	0.00213411	-0.808647	down
gma-miR393h	55.3123	35.3923	0.00230971	-0.644165	down
gma-miR393i	55.3123	35.3923	0.00230971	-0.644165	down
gma-miR393j	55.3123	35.3923	0.00230971	-0.644165	down
gma-miR393k	55.3123	35.3923	0.00230971	-0.644165	down
gma-miR396b-5p	11026.6	6342.09	0	-0.797952	down
gma-miR396c	11026.6	6342.09	0	-0.797952	down
gma-miR396k-5p	11026.6	6342.09	0	-0.797952	down
gma-miR398a	16.0115	6.3389	0.00504629	-1.3368	down
gma-miR398b	16.0115	6.3389	0.00504629	-1.3368	down
gma-miR4344	11.1595	3.6977	0.00908179	-1.59357	down
gma-miR4345	385.73	184.885	0	-1.06096	down
gma-miR4352b	33.9637	19.0168	0.00339186	-0.836719	down
gma-miR4370	24.2598	10.0366	0.000946917	-1.2733	down
gma-miR4374a	6.7927	12.1496	0.0485669	0.838852	up
gma-miR4382	20.3782	8.4519	0.00232425	-1.26968	down
gma-miR4397-3p	29.5969	9.5084	9.7e-06	-1.63817	down
gma-miR4413b	80.5424	35.3923	0	-1.18631	down
gma-miR482a-3p	2705.45	1697.77	0	-0.672224	down
gma-miR482c-3p	2509.43	1605.33	0	-0.644489	down
gma-miR482c-5p	7.7631	1.5847	0.00802037	-2.29242	down
gma-miR5035-3p	26.6858	13.7343	0.00405896	-0.958289	down
gma-miR5037c	17.467	40.1465	4.08e-05	1.20064	up
gma-miR5374-5p	164.966	99.838	0	-0.724512	down
gma-miR5376	287.236	161.114	0	-0.834151	down
gma-miR5671b	41.7268	17.9603	2.54e-05	-1.21616	down
gma-miR6300	15.0411	8.9801	0.0439138	-0.744107	down
gma-miR862a	3.8816	9.5084	0.027698	1.29255	up
gma-miR9750	13.1003	7.3954	0.0448713	-0.8249	down
gma-miR9755	24.745	7.9236	6.17e-05	-1.64291	down
gma-miR9760	3.8816	0.5282	0.040386	-2.8775	down
unconservative_Chr01_106423	15.5263	7.9236	0.0210235	-0.970486	down
unconservative_Chr01_134539	7.2779	2.113	0.022711	-1.78423	down
unconservative_Chr01_15605	29.1117	19.0168	0.02066	-0.614325	down
unconservative_Chr01_36864	16.0115	6.8672	0.00818658	-1.22131	down
unconservative_Chr01_45355	6.7927	1.5847	0.0171494	-2.09978	down
unconservative_Chr01_81934	16.4966	7.3954	0.0093956	-1.15747	down
unconservative_Chr02_193088	25.7154	12.6778	0.00324121	-1.02033	down
unconservative_Chr02_200290	6.3075	1.5847	0.0246854	-1.99286	down
unconservative_Chr02_200713	13.5855	6.3389	0.0198077	-1.09976	down
unconservative_Chr02_278938	8.2483	2.6412	0.0207104	-1.6429	down
unconservative_Chr02_283402	17.467	9.5084	0.0217195	-0.877357	down
unconservative_Chr02_289614	14.0707	6.3389	0.0152933	-1.15039	down
unconservative_Chr03_404696	6.7927	2.113	0.0319567	-1.68469	down
unconservative_Chr03_413156	20.8634	10.0366	0.00633274	-1.0557	down
unconservative_Chr04_461199	4.852	1.0565	0.0388974	-2.19929	down
unconservative_Chr04_465154	3.8816	0.5282	0.040386	-2.8775	down
unconservative_Chr04_477576	13.5855	5.8107	0.0133236	-1.22528	down
unconservative_Chr04_527378	12.6151	6.8672	0.0423661	-0.877358	down
unconservative_Chr05_619289	6.7927	1.5847	0.0171494	-2.09978	down
unconservative_Chr05_620937	16.9818	7.9236	0.01065	-1.09976	down
unconservative_Chr05_648148	13.1003	6.8672	0.0343507	-0.931806	down
unconservative_Chr06_769797	8.2483	2.6412	0.0207104	-1.6429	down
unconservative_Chr06_824321	89.276	55.4655	7.65e-05	-0.686682	down
unconservative_Chr06_843120	24.2598	8.9801	0.000321068	-1.43376	down
unconservative_Chr06_843121	6.3075	22.1862	4.75e-05	1.81452	up
unconservative_Chr07_862713	14.5559	7.3954	0.0239219	-0.976904	down
unconservative_Chr07_885178	88.7908	54.4091	5.44e-05	-0.706562	down
unconservative_Chr07_909052	7.2779	1.5847	0.0116839	-2.19931	down
unconservative_Chr07_952007	11.1595	2.113	0.000974158	-2.40091	down
unconservative_Chr07_967268	23.2894	14.2626	0.0217797	-0.707436	down
unconservative_Chr09_1191326	8.7335	3.6977	0.0389531	-1.23993	down
unconservative_Chr09_1209910	25.7154	12.6778	0.00324121	-1.02033	down
unconservative_Chr09_1246018	3.8816	0.5282	0.040386	-2.8775	down
unconservative_Chr09_1247322	8.2483	3.1695	0.0338748	-1.37984	down
unconservative_Chr09_1262716	7.2779	2.6412	0.0389579	-1.46233	down
unconservative_Chr09_1271129	3.3964	7.9236	0.0471482	1.22215	up
unconservative_Chr09_1283444	42.212	24.8274	0.00231742	-0.76572	down
unconservative_Chr09_1295118	16.9818	9.5084	0.0264261	-0.836715	down
unconservative_Chr10_1381069	12.1299	6.3389	0.0392175	-0.936263	down
unconservative_Chr11_1481038	262.006	120.439	0	-1.12129	down
unconservative_Chr11_1487737	24.2598	12.1496	0.00470702	-0.997659	down
unconservative_Chr11_1496326	6.7927	1.5847	0.0171494	-2.09978	down
unconservative_Chr11_1510463	65.5014	42.7877	0.00156151	-0.61433	down
unconservative_Chr12_1604013	9.2187	3.6977	0.0292016	-1.31794	down
unconservative_Chr12_1611358	0	3.1695	0.0234085	24.9178	up
unconservative_Chr12_1611359	0	3.1695	0.0234085	24.9178	up
unconservative_Chr12_1621183	7.7631	2.113	0.0161468	-1.87734	down
unconservative_Chr12_1650994	81.998	35.3923	0	-1.21215	down
unconservative_Chr12_1685398	29.1117	17.9603	0.0135676	-0.696788	down
unconservative_Chr13_1705713	9.7039	4.2259	0.0339711	-1.19931	down
unconservative_Chr13_1801575	4.3668	0.5282	0.0256873	-3.04742	down
unconservative_Chr14_1909580	4.852	0.5282	0.016528	-3.19942	down
unconservative_Chr15_2031566	18.4374	8.9801	0.010532	-1.03783	down
unconservative_Chr15_2059410	6.7927	12.6778	0.0388482	0.900247	up
unconservative_Chr15_2062614	14.5559	5.2824	0.00463827	-1.46234	down
unconservative_Chr15_2092038	15.5263	8.4519	0.0281154	-0.877366	down
unconservative_Chr15_2130785	6.7927	2.113	0.0319567	-1.68469	down
unconservative_Chr15_2140708	28.6265	14.2626	0.00220148	-1.00511	down
unconservative_Chr16_2164521	5.8223	1.0565	0.0175089	-2.4623	down
unconservative_Chr16_2172288	12.1299	3.6977	0.00440574	-1.71387	down
unconservative_Chr16_2181710	16.0115	6.8672	0.00818658	-1.22131	down
unconservative_Chr16_2187716	14.0707	3.6977	0.00101351	-1.92799	down
unconservative_Chr16_2232001	3.8816	0	0.0121731	-25.2101	down
unconservative_Chr18_2435843	30.5673	13.2061	0.000325846	-1.21078	down
unconservative_Chr18_2528583	19.4078	9.5084	0.00927813	-1.02936	down
unconservative_Chr18_2542783	0	3.1695	0.0234085	24.9178	up
unconservative_Chr18_2559193	16.4966	8.9801	0.0246345	-0.877365	down
unconservative_Chr19_2566862	12.1299	5.8107	0.0283915	-1.06178	down
unconservative_Chr19_2581051	56.7679	22.1862	0	-1.35541	down
unconservative_Chr19_2654801	3.3964	0	0.020925	-25.0175	down
unconservative_Chr20_2709130	9.2187	4.2259	0.0434183	-1.1253	down
unconservative_Chr20_2801276	21.8338	11.6214	0.0108601	-0.909779	down
unconservative_Chr20_2820531	11.6447	5.8107	0.0362094	-1.00289	down
unconservative_Chr20_2834435	9.2187	4.2259	0.0434183	-1.1253	down
unconservative_scaffold_21_2836685	19.4078	6.8672	0.000960624	-1.49884	down
S01—Nannong 10-1 mock; S02—Nannong 10-1 at 12 hpi

## Sheet: Table S2
Table S1 Different expressed miRNAs in 06-070583 by P. sojae
#ID	S03	S04	FDR	log2FC	regulated
gma-miR1520f-3p	0.3988	2.3159	0.018832	2.53784	up
gma-miR1535a	2.9245	6.6583	0.0116904	1.18696	up
gma-miR1535b	23.5292	40.5286	0	0.784488	up
gma-miR156r	11.4323	5.7898	0.00577727	-0.98153	down
gma-miR159b-3p	34.5627	20.2643	5.28e-05	-0.770276	down
gma-miR159f-3p	34.5627	20.2643	5.28e-05	-0.770276	down
gma-miR160a-5p	158.856	78.7414	0	-1.01252	down
gma-miR160b	158.058	77.5834	0	-1.02663	down
gma-miR160c	153.804	73.5305	0	-1.06468	down
gma-miR160d	153.804	73.5305	0	-1.06468	down
gma-miR160e	158.058	77.5834	0	-1.02663	down
gma-miR160f	158.856	78.7414	0	-1.01252	down
gma-miR164a	326.485	209.302	0	-0.641433	down
gma-miR164b	326.352	209.012	0	-0.642842	down
gma-miR164c	326.485	209.012	0	-0.64343	down
gma-miR164d	326.352	209.012	0	-0.642842	down
gma-miR164e	326.485	209.302	0	-0.641433	down
gma-miR164f	326.618	209.302	0	-0.64202	down
gma-miR164g	326.485	209.302	0	-0.641433	down
gma-miR164h	326.618	209.302	0	-0.64202	down
gma-miR164i	326.618	209.302	0	-0.64202	down
gma-miR164j	326.618	209.302	0	-0.64202	down
gma-miR164k	326.485	209.302	0	-0.641433	down
gma-miR166a-5p	625.851	411.366	0	-0.605397	down
gma-miR166c-5p	625.851	411.366	0	-0.605397	down
gma-miR166l	623.325	410.208	0	-0.60363	down
gma-miR171k-5p	45.5962	30.107	0.000149808	-0.598815	down
gma-miR171l	45.5962	30.107	0.000149808	-0.598815	down
gma-miR171r	4.9185	8.1057	0.0434077	0.720718	up
gma-miR2111b	13.1604	8.3952	0.0247592	-0.648567	down
gma-miR2111c	13.1604	8.3952	0.0247592	-0.648567	down
gma-miR2111e	13.1604	8.3952	0.0247592	-0.648567	down
gma-miR2111f	13.2934	8.6847	0.0287335	-0.614162	down
gma-miR319n	0.3988	2.3159	0.018832	2.53784	up
gma-miR394a-3p	12.8945	5.2108	0.000275373	-1.30718	down
gma-miR394a-5p	62.4787	34.7388	0	-0.846817	down
gma-miR394b-5p	62.4787	34.7388	0	-0.846817	down
gma-miR394c-5p	62.4787	34.7388	0	-0.846817	down
gma-miR394g	62.4787	34.7388	0	-0.846817	down
gma-miR398a	7.1784	2.3159	0.00217059	-1.63209	down
gma-miR398b	7.1784	2.3159	0.00217059	-1.63209	down
gma-miR398c	11.964	6.0793	0.0049547	-0.976723	down
gma-miR398d	11.964	6.0793	0.0049547	-0.976723	down
gma-miR408a-3p	17.1484	8.9742	0.00105783	-0.934219	down
gma-miR408b-3p	17.1484	8.9742	0.00105783	-0.934219	down
gma-miR408c-3p	17.1484	8.9742	0.00105783	-0.934219	down
gma-miR408d	17.1484	8.9742	0.00105783	-0.934219	down
gma-miR4370	1.8611	5.7898	0.0029596	1.63736	up
gma-miR4387a	0.7976	2.6054	0.0460244	1.70777	up
gma-miR4397-3p	6.2479	10.4217	0.0230448	0.738147	up
gma-miR5037a	1.8611	0	0.018732	-24.1497	down
gma-miR5037c	46.1279	5.2108	0	-3.14606	down
gma-miR5670b	2.9245	6.6583	0.0116904	1.18696	up
gma-miR6300	12.8945	4.0529	1.86e-05	-1.66973	down
gma-miR862a	10.2359	0.2895	0	-5.14393	down
unconservative_Chr01_36864	2.9245	6.0793	0.0245757	1.05572	up
unconservative_Chr03_329788	1.1964	4.3424	0.0054875	1.85979	up
unconservative_Chr04_550536	7.1784	11.0006	0.0367132	0.615848	up
unconservative_Chr04_564283	4.1209	0.8685	0.00641392	-2.24636	down
unconservative_Chr05_640599	26.3208	42.8446	1.86e-05	0.70291	up
unconservative_Chr06_824321	19.1424	31.5544	0.000149808	0.721069	up
unconservative_Chr06_843120	2.9245	5.5003	0.0482035	0.91132	up
unconservative_Chr07_899949	9.8371	15.0535	0.0185429	0.613794	up
unconservative_Chr07_967268	3.8551	7.2373	0.0270542	0.908683	up
unconservative_Chr07_971442	9.8371	15.0535	0.0185429	0.613794	up
unconservative_Chr07_980610	31.5052	53.2662	0	0.75763	up
unconservative_Chr07_980611	31.5052	53.2662	0	0.75763	up
unconservative_Chr08_1137924	31.5052	53.2662	0	0.75763	up
unconservative_Chr09_1166069	31.5052	53.2662	0	0.75763	up
unconservative_Chr09_1168014	0.6647	2.6054	0.0299252	1.97073	up
unconservative_Chr09_1185313	31.5052	53.2662	0	0.75763	up
unconservative_Chr09_1185314	31.5052	53.2662	0	0.75763	up
unconservative_Chr09_1283444	1.7281	4.0529	0.0420829	1.22977	up
unconservative_Chr10_1396306	26.055	42.8446	9.86e-06	0.717553	up
unconservative_Chr10_1419348	0.7976	2.6054	0.0460244	1.70777	up
unconservative_Chr10_1419350	0.7976	2.6054	0.0460244	1.70777	up
unconservative_Chr11_1466052	51.0465	31.5544	9.86e-06	-0.693971	down
unconservative_Chr11_1510463	14.3568	22.0013	0.00507407	0.615855	up
unconservative_Chr13_1818258	31.5052	53.2662	0	0.75763	up
unconservative_Chr13_1828762	2.1269	5.7898	0.00655878	1.44476	up
unconservative_Chr14_1925611	31.5052	53.2662	0	0.75763	up
unconservative_Chr14_1949583	1.5952	3.7634	0.0468241	1.2383	up
unconservative_Chr14_1949584	1.5952	3.7634	0.0468241	1.2383	up
unconservative_Chr14_1968688	0.7976	2.6054	0.0460244	1.70777	up
unconservative_Chr15_2008002	8.6407	13.8955	0.0142436	0.685398	up
unconservative_Chr15_2040491	8.9065	4.3424	0.0120156	-1.03637	down
unconservative_Chr15_2092781	5.4503	2.6054	0.0426981	-1.06483	down
unconservative_Chr16_2181710	2.9245	6.0793	0.0245757	1.05572	up
unconservative_Chr16_2201800	3.5892	6.3688	0.0471583	0.827359	up
unconservative_Chr16_2242591	3.5892	6.3688	0.0471583	0.827359	up
unconservative_Chr17_2278150	31.5052	53.2662	0	0.75763	up
unconservative_Chr17_2368471	0	1.158	0.0318936	23.4651	up
unconservative_Chr18_2425062	1.3293	3.7634	0.025712	1.50137	up
unconservative_Chr18_2508960	1.3293	3.4739	0.04238	1.38589	up
unconservative_Chr18_2528594	0.5317	2.3159	0.0336846	2.12289	up
unconservative_Chr19_2581051	9.7041	15.6325	0.00970735	0.687882	up
unconservative_Chr19_2626799	0	1.4475	0.0122479	23.7871	up
unconservative_Chr20_2774454	31.5052	53.2662	0	0.75763	up
S03--06-070583 mock; S04--06-070583 at 12 hpi

## Sheet: Table S3
Table S3 miRNA target gene information
miRNA	Predicted Target genes
gma-miR1508a	Glyma.16G162100.Wm82.a2.v1
gma-miR1508c	Glyma.06G320900.Wm82.a2.v1;Glyma.12G118300.Wm82.a2.v1;Glyma.16G162100.Wm82.a2.v1;Glyma.16G199700.Wm82.a2.v1;Glyma.09G175200.Wm82.a2.v1;Glyma.16G139800.Wm82.a2.v1;Glyma.09G256500.Wm82.a2.v1;Glyma.16G162000.Wm82.a2.v1;Glyma.16G162800.Wm82.a2.v1;Glyma.09G175000.Wm82.a2.v1;Glyma.09G171200.Wm82.a2.v1;Glyma.16G165400.Wm82.a2.v1;Glyma.16G162700.Wm82.a2.v1;Glyma.16G160700.Wm82.a2.v1;Glyma.09G256600.Wm82.…
gma-miR1510b-5p	Glyma.18G089400.Wm82.a2.v1;Glyma.02G076700.Wm82.a2.v1
gma-miR396c	Glyma.09G225000.Wm82.a2.v1;Glyma.17G111800.Wm82.a2.v1;Glyma.13G159700.Wm82.a2.v1;Glyma.19G128100.Wm82.a2.v1
gma-miR396k-5p	Glyma.17G111800.Wm82.a2.v1;Glyma.19G128100.Wm82.a2.v1;Glyma.13G159700.Wm82.a2.v1;Glyma.09G225000.Wm82.a2.v1
gma-miR4413b	Glyma.07G101900.Wm82.a2.v1;Glyma.09G171200.Wm82.a2.v1;Glyma.13G232900.Wm82.a2.v1;Glyma.09G175800.Wm82.a2.v1;Glyma.09G176000.Wm82.a2.v1;Glyma.03G190300.Wm82.a2.v1;Glyma.09G256600.Wm82.a2.v1;Glyma.14G202200.Wm82.a2.v1;Glyma.16G162100.Wm82.a2.v1;Glyma.15G201200.Wm82.a2.v1;Glyma.09G176400.Wm82.a2.v1;Glyma.09G174800.Wm82.a2.v1;Glyma.16G160700.Wm82.a2.v1;Glyma.01G233900.Wm82.a2.v1;Glyma.16G162700.Wm82.…
gma-miR5374-5p	Glyma.05G082200.Wm82.a2.v1;Glyma.17G179200.Wm82.a2.v1
gma-miR5376	Glyma.13G190000.Wm82.a2.v1;Glyma.13G190800.Wm82.a2.v1;Glyma.17G206100.Wm82.a2.v1;Glyma.13G190400.Wm82.a2.v1;Glyma.13G195600.Wm82.a2.v1;Glyma.13G190300.Wm82.a2.v1;Glyma.15G232800.Wm82.a2.v1;Glyma.06G130100.Wm82.a2.v1;Glyma.13G193100.Wm82.a2.v1;Glyma.15G233400.Wm82.a2.v1;Glyma.15G233200.Wm82.a2.v1;Glyma.01G077900.Wm82.a2.v1;Glyma.04G234500.Wm82.a2.v1;Glyma.13G184900.Wm82.a2.v1;Glyma.13G194100.Wm82.…
gma-miR1535b	Glyma.17G017400.Wm82.a2.v1;Glyma.18G297300.Wm82.a2.v1;Glyma.10G086600.Wm82.a2.v1;Glyma.02G307200.Wm82.a2.v1;Glyma.15G103800.Wm82.a2.v1;Glyma.07G256700.Wm82.a2.v1;Glyma.10G273500.Wm82.a2.v1;Glyma.10G120100.Wm82.a2.v1;Glyma.20G116500.Wm82.a2.v1
gma-miR160a-5p	Glyma.11G145500.Wm82.a2.v1;Glyma.10G210600.Wm82.a2.v1;Glyma.13G084700.Wm82.a2.v1;Glyma.12G076200.Wm82.a2.v1;Glyma.13G325200.Wm82.a2.v1;Glyma.12G174100.Wm82.a2.v1;Glyma.04G254200.Wm82.a2.v1;Glyma.10G053500.Wm82.a2.v1;Glyma.13G140600.Wm82.a2.v1;Glyma.14G166500.Wm82.a2.v1;Glyma.20G180000.Wm82.a2.v1;Glyma.19G181900.Wm82.a2.v1
gma-miR160b	Glyma.10G053500.Wm82.a2.v1;Glyma.14G166500.Wm82.a2.v1;Glyma.13G140600.Wm82.a2.v1;Glyma.19G181900.Wm82.a2.v1;Glyma.20G180000.Wm82.a2.v1;Glyma.04G254200.Wm82.a2.v1;Glyma.10G210600.Wm82.a2.v1;Glyma.13G084700.Wm82.a2.v1;Glyma.11G145500.Wm82.a2.v1;Glyma.13G325200.Wm82.a2.v1;Glyma.12G174100.Wm82.a2.v1;Glyma.12G076200.Wm82.a2.v1
gma-miR160c	Glyma.19G181900.Wm82.a2.v1;Glyma.20G180000.Wm82.a2.v1;Glyma.10G053500.Wm82.a2.v1;Glyma.14G166500.Wm82.a2.v1;Glyma.13G140600.Wm82.a2.v1;Glyma.04G254200.Wm82.a2.v1;Glyma.12G174100.Wm82.a2.v1;Glyma.13G325200.Wm82.a2.v1;Glyma.12G076200.Wm82.a2.v1;Glyma.13G084700.Wm82.a2.v1;Glyma.10G210600.Wm82.a2.v1;Glyma.11G145500.Wm82.a2.v1
gma-miR160d	Glyma.13G325200.Wm82.a2.v1;Glyma.12G174100.Wm82.a2.v1;Glyma.12G076200.Wm82.a2.v1;Glyma.10G210600.Wm82.a2.v1;Glyma.13G084700.Wm82.a2.v1;Glyma.11G145500.Wm82.a2.v1;Glyma.10G053500.Wm82.a2.v1;Glyma.13G140600.Wm82.a2.v1;Glyma.14G166500.Wm82.a2.v1;Glyma.20G180000.Wm82.a2.v1;Glyma.19G181900.Wm82.a2.v1;Glyma.04G254200.Wm82.a2.v1
gma-miR160e	Glyma.20G180000.Wm82.a2.v1;Glyma.19G181900.Wm82.a2.v1;Glyma.10G053500.Wm82.a2.v1;Glyma.14G166500.Wm82.a2.v1;Glyma.13G140600.Wm82.a2.v1;Glyma.04G254200.Wm82.a2.v1;Glyma.13G084700.Wm82.a2.v1;Glyma.10G210600.Wm82.a2.v1;Glyma.11G145500.Wm82.a2.v1;Glyma.12G174100.Wm82.a2.v1;Glyma.13G325200.Wm82.a2.v1;Glyma.12G076200.Wm82.a2.v1
gma-miR160f	Glyma.12G174100.Wm82.a2.v1;Glyma.13G325200.Wm82.a2.v1;Glyma.12G076200.Wm82.a2.v1;Glyma.13G084700.Wm82.a2.v1;Glyma.10G210600.Wm82.a2.v1;Glyma.11G145500.Wm82.a2.v1;Glyma.19G181900.Wm82.a2.v1;Glyma.20G180000.Wm82.a2.v1;Glyma.14G166500.Wm82.a2.v1;Glyma.10G053500.Wm82.a2.v1;Glyma.13G140600.Wm82.a2.v1;Glyma.04G254200.Wm82.a2.v1
column represents the sum of the annotations.

## Sheet: Table S4
Table S4 Differential expression miRNA target gene annotation
COG	GO	KEGG	Swissprot	NR	KOG	Pfam	Total
544	889	246	1144	1443	667	1278	1443

## Sheet: Table S5
Table S5 Samples of different miRNA target gene annotation results
ID	All miRNA	miRNA with Target	Target gene
S01	977	544	1376
S02	931	519	1355
S03	994	546	1399
S04	912	510	1283
Note: BMK ID: Sample number, all MiRNA:miRNA total, MiRNA with target: MiRNA number of target genes predicted, target gene: number of target genes predicted
